# Supplementary material
Source: MDPI journal article supplement (https://www.mdpi.com/2073-4395/12/4/755)
Supplement: s1 [file s1]

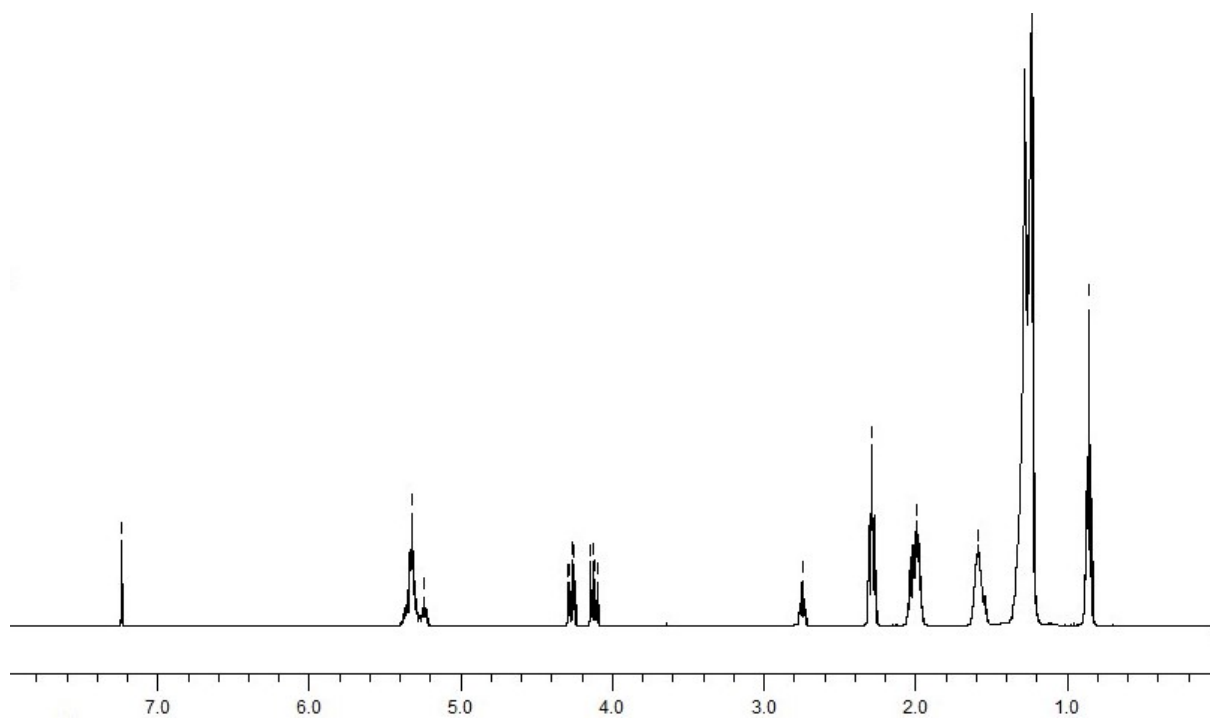

**Figure S1: PLF<sub>He2</sub> NMR.**

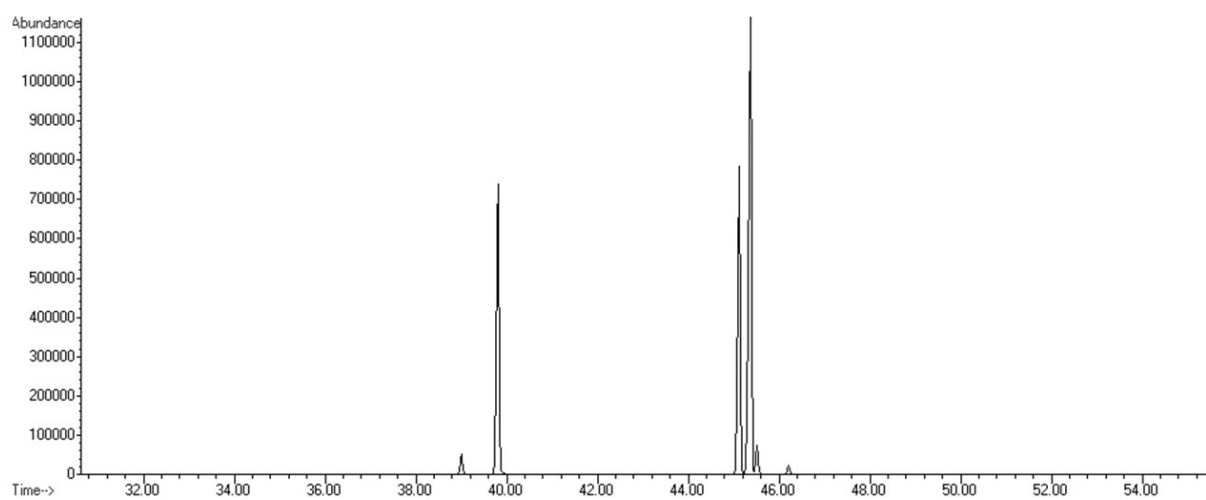

**Figure S2: PLF<sub>He2</sub> GC-MS.**

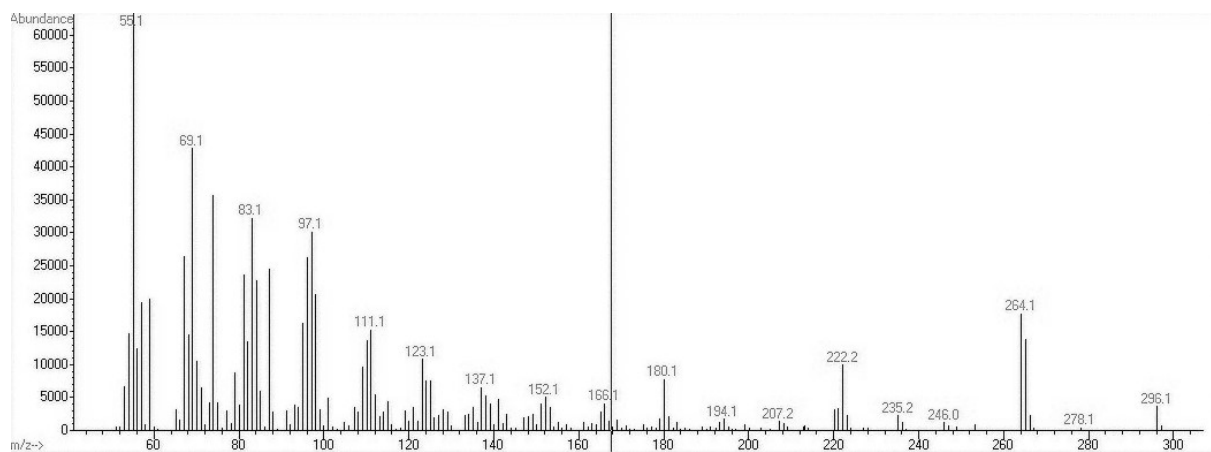

**Figure S3: Oleic acid.**

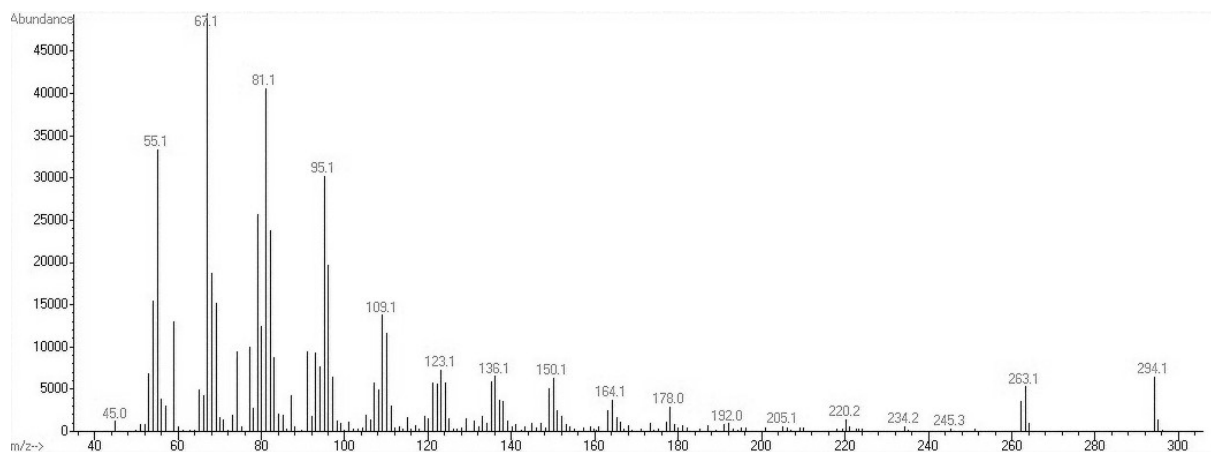

**Figure S4: Linoleic Acid.**

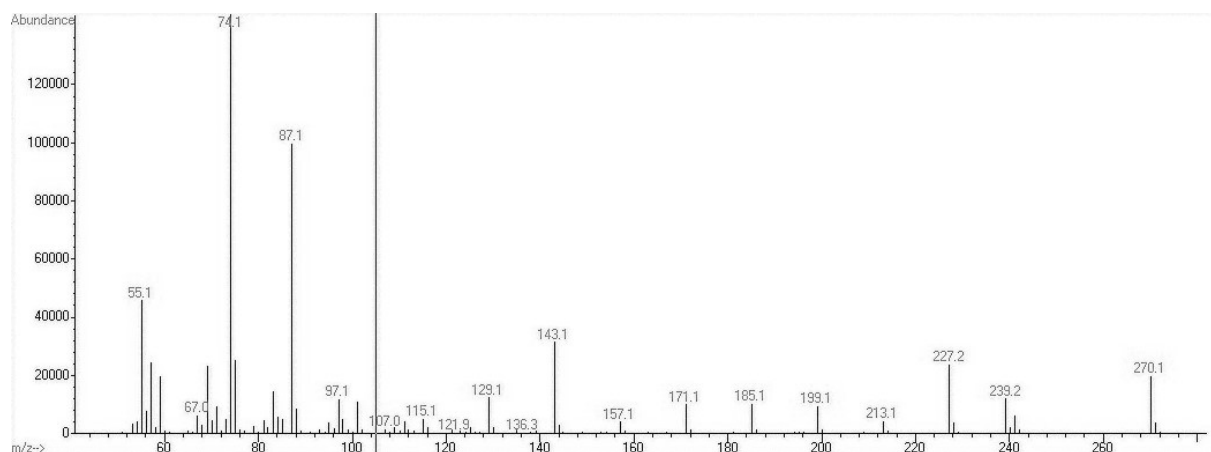

**Figure S5: Palmitic Acid.**

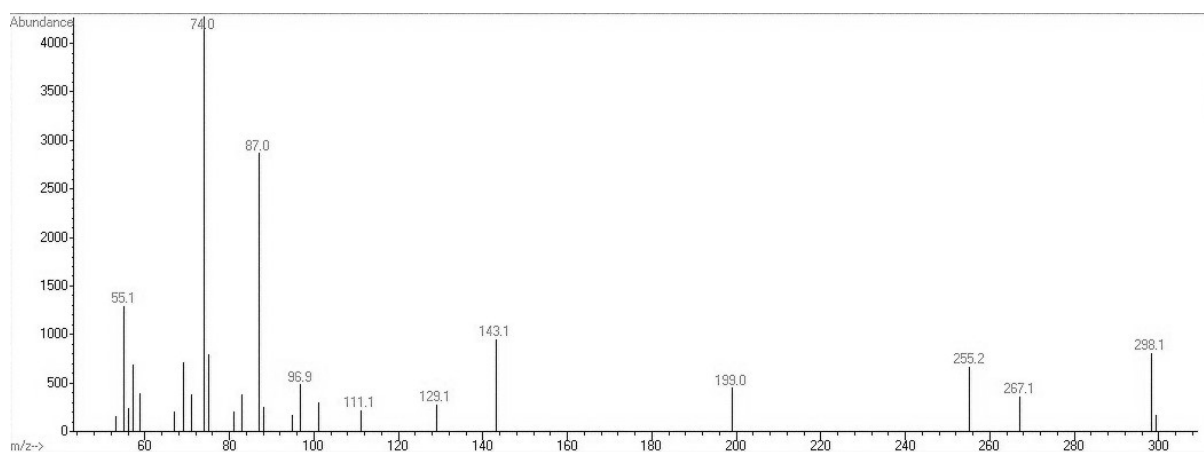

Figure S6: Stearic Acid.

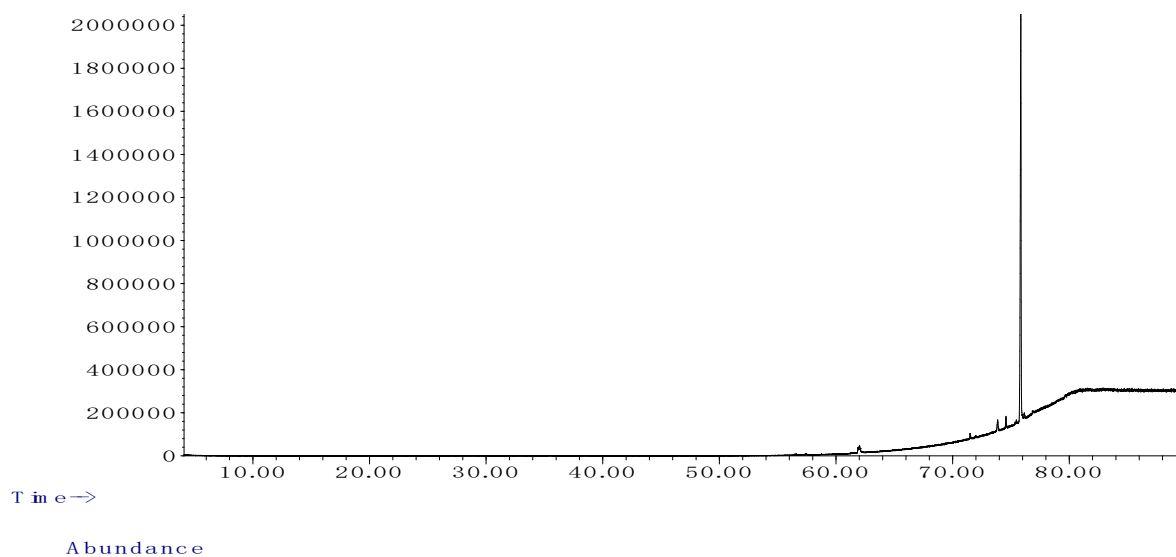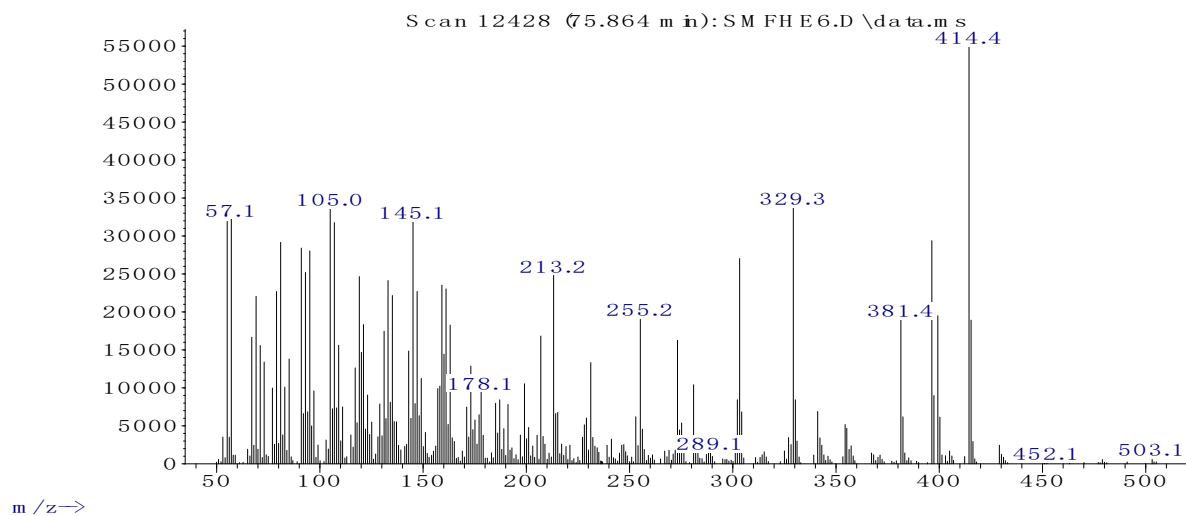

Figure S7: Fraction PLFHe4,  $\gamma$ -Sitosterol.

**Table S1. Tentative identification of constituents of *Pistacia lentiscus* hexane extracts by GC-MS.**

| RT (min) | Compound                            | %     | Class                       | %            |
|----------|-------------------------------------|-------|-----------------------------|--------------|
| 5.19     | $\alpha$ -Pinene                    | 0.43  | <b>Total Terpenes</b>       | <b>1.80</b>  |
| 6.39     | p-Cymene                            | 0.24  |                             |              |
| 6.52     | pseudolimonene                      | 1.02  |                             |              |
| 7.42     | $\gamma$ -Terpinene                 | 0.12  |                             |              |
| 15.03    | (E)-2-Decenal                       | 1.21  | <b>Total Aldehydes</b>      | <b>1.91</b>  |
| 16.37    | (E,E)-2,4-Decadienal                | 0.70  |                             |              |
| 19.54    | Ylangene                            | 0.17  | <b>Total Sesquiterpenes</b> | <b>5.76</b>  |
| 19.72    | $\alpha$ -Cubebene                  | 0.34  |                             |              |
| 21.47    | Caryophyllene                       | 0.38  |                             |              |
| 22.85    | Humulene                            | 0.13  |                             |              |
| 23.15    | Alloaromadendrene                   | 0.14  |                             |              |
| 23.87    | $\gamma$ -Muurokene                 | 1.28  |                             |              |
| 24.00    | (+)- $\alpha$ -amorphene            | 0.13  |                             |              |
| 24.19    | eremophilene                        | 0.17  |                             |              |
| 24.57    | $\gamma$ -maalinene                 | 0.34  |                             |              |
| 24.84    | $\alpha$ -Muurokene                 | 0.46  |                             |              |
| 25.35    | (R)- $\gamma$ -cadinene             | 1.22  |                             |              |
| 25.77    | $\delta$ -cadinene                  | 0.38  |                             |              |
| 26.08    | cadinadiene                         | 0.33  |                             |              |
| 26.29    | $\alpha$ -cadinene                  | 0.28  |                             |              |
| 29.79    | Muurola-4,10(14)-dien-1 $\beta$ -ol | 0.52  | <b>Terpenoid</b>            | <b>0.52</b>  |
| 40.64    | methyl palmitate                    | 5.75  | <b>Total Methyl esters</b>  | <b>14.36</b> |
| 41.19    | palmitic acid                       | 12.26 | Acid                        |              |
| 46.00    | methyl linoleate                    | 3.65  | Methyl ester                |              |
| 46.39    | methyl oleate                       | 4.96  |                             |              |
| 47.49    | linoleic acid                       | 12.38 | <b>Total Acids</b>          | <b>39.76</b> |
| 47.73    | oleic acid                          | 13.11 |                             |              |
| 48.30    | stearic acid                        | 2.01  |                             |              |
| 51.56    | Cardanol 13:0                       | 2.86  | Phenol                      |              |
| 51.89    | N/I <sup>1</sup>                    | 0.12  |                             |              |
| 56.79    | Cardanol 15:1                       | 7.68  | Phenol                      |              |
| 56.91    | N/I                                 | 2.23  |                             |              |
| 57.08    | Cardanol 15:1                       | 3.39  | <b>Total Phenols</b>        | <b>28.35</b> |
| 57.36    | Cardanol 15:0                       | 4.89  |                             |              |
| 57.63    | N/I                                 | 0.14  |                             |              |
| 62.07    | Cardanol 17:1                       | 9.53  | Phenol                      |              |
| 76.23    | $\gamma$ -Sitosterol                | 5.08  |                             | <b>4.74</b>  |

<sup>1</sup> Not identified
